# Supplementary material
Source: PubMed Central journal article supplement (PMC4165443)
Supplement: bi500767x_si_001.pdf [file bi500767x_si_001.pdf]

## Supporting Information for

# *Spectroscopic and Computational Investigation of Fe(III) Cysteine Dioxygenase: Implications for the Nature of the Putative Superoxo- Fe(III) Intermediate*

*Elizabeth J. Blaesl,<sup>1</sup> Brian G. Fox,<sup>2</sup> Thomas C. Brunold<sup>1\*</sup>*

<sup>1</sup> Department of Chemistry, University of Wisconsin-Madison, Madison, WI 53706

<sup>2</sup> Department of Biochemistry, University of Wisconsin-Madison, Madison, WI 53706

**Table S1.** Experimentally derived<sup>a</sup> and computationally predicted<sup>b</sup> EPR parameters for various species mentioned in this work, where D is given in wavenumbers

| Species                                                                     | $g_1$        | $g_2$        | $g_3$        | D            | E/D          |
|-----------------------------------------------------------------------------|--------------|--------------|--------------|--------------|--------------|
| <b><i>S1, Azide-bound Fe(III)CDO</i></b>                                    | <b>2.001</b> | <b>2.011</b> | <b>2.017</b> | <b>2.985</b> | <b>0.305</b> |
| (N <sub>3</sub> <sup>-</sup> /2H <sub>2</sub> O)-Fe(III)CDO                 | 2.001        | 2.010        | 2.017        | 1.403        | 0.109        |
| (N <sub>3</sub> <sup>-</sup> /OH <sup>-</sup> )-Fe(III)CDO                  | 2.009        | 2.011        | 2.017        | -2.988       | 0.320        |
| (N <sub>3</sub> <sup>-</sup> /OH <sup>-</sup> /H <sub>2</sub> O)-Fe(III)CDO | 2.008        | 2.012        | 2.016        | 1.365        | 0.321        |
| (N <sub>3</sub> <sup>-</sup> /2OH <sup>-</sup> )-Fe(III)CDO                 | 2.009        | 2.011        | 2.012        | 1.447        | 0.107        |
| <b><i>S2, Cys-bound Fe(III)CDO</i></b>                                      | <b>2.030</b> | <b>2.030</b> | <b>2.030</b> | <b>0.726</b> | <b>0.317</b> |
| (Cys/OH <sup>-</sup> )-Fe(III)CDO                                           | 2.011        | 2.016        | 2.028        | 0.868        | 0.207        |
| (Cys/H <sub>2</sub> O)-Fe(III)CDO                                           | 2.025        | 2.039        | 2.048        | -1.963       | 0.100        |
| Cys-Fe(III)CDO                                                              | 2.021        | 2.051        | 2.067        | -4.142       | 0.171        |
| <b><i>S3, (Cys/N<sub>3</sub><sup>-</sup>)-Fe(III)CDO</i></b>                | <b>1.888</b> | <b>2.550</b> | <b>2.435</b> | <i>N/A</i>   | <i>N/A</i>   |
| (Cys/N <sub>3</sub> <sup>-</sup> )-Fe(III)CDO                               | 2.027        | 2.156        | 2.193        | <i>N/A</i>   | <i>N/A</i>   |

a Obtained from fits of experimental spectra using EasySpin

b EPR parameters were computed as described in the Experimental Section

**Table S2.** Relevant active site bond lengths (in Å) as derived from QM/MM optimized models of azide-bound Fe(III)CDO

| Species                                                                     | Fe-His <sub>86</sub> | Fe-His <sub>88</sub> | Fe-His <sub>140</sub> | Fe-N <sub>Az</sub> | Fe-O <sub>H2O</sub> | Fe-O <sub>OH</sub> |
|-----------------------------------------------------------------------------|----------------------|----------------------|-----------------------|--------------------|---------------------|--------------------|
| (N <sub>3</sub> <sup>-</sup> /2H <sub>2</sub> O)-Fe(III)CDO                 | 2.108                | 2.072                | 2.111                 | 1.938              | 2.203,<br>2.364     | <i>N/A</i>         |
| (N <sub>3</sub> <sup>-</sup> /OH <sup>-</sup> )-Fe(III)CDO                  | 2.127                | 2.039                | 2.152                 | 2.026              | 3.313               | 1.896              |
| (N <sub>3</sub> <sup>-</sup> /OH <sup>-</sup> /H <sub>2</sub> O)-Fe(III)CDO | 2.105                | 2.236                | 2.200                 | 2.011              | 2.326               | 1.876              |
| (N <sub>3</sub> <sup>-</sup> /2OH <sup>-</sup> )-Fe(III)CDO                 | 2.179                | 2.316                | 2.288                 | 2.116              | <i>N/A</i>          | 1.900,<br>1.949    |

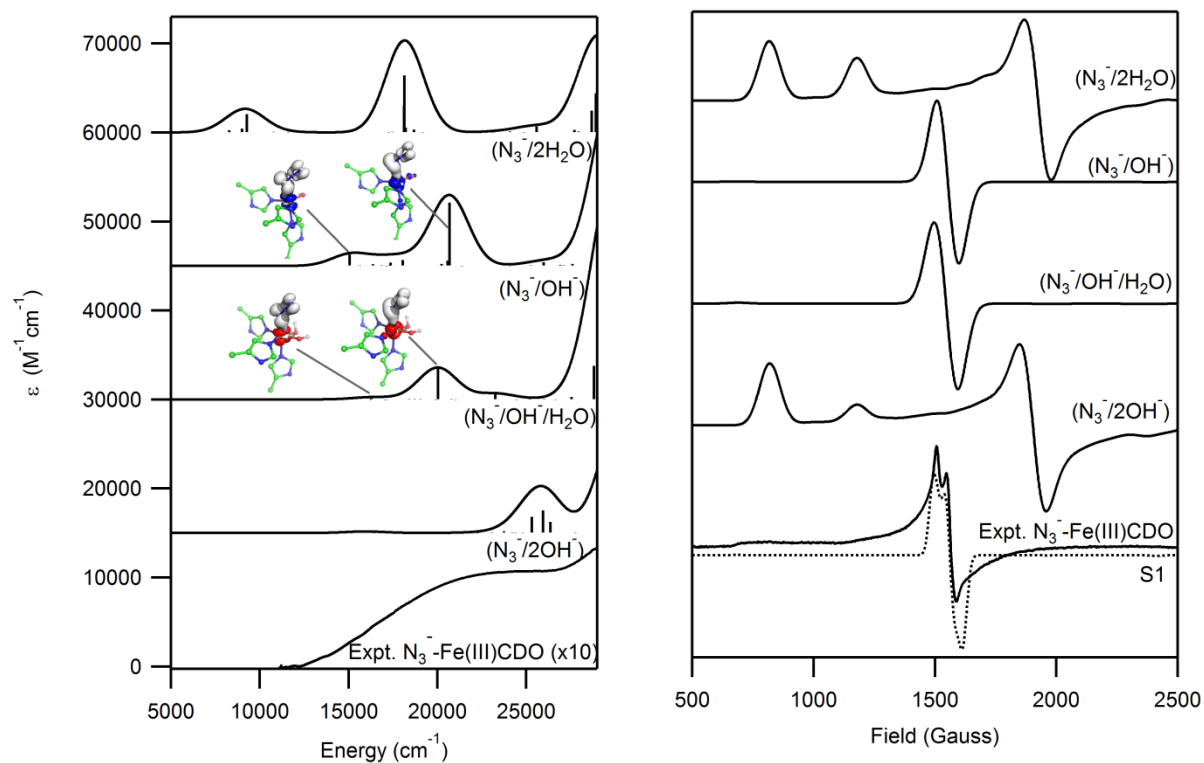

**Figure S1.** Comparison of the INDO/S-CI predicted Abs spectra (left) and DFT-computed EPR spectra (right) with their experimentally derived counterparts. EDDMs are shown next to relevant INDO/S-CI-computed transitions, where loss and gain of electron density are denoted by white and colored lobes, respectively. Also shown is the simulated EPR spectrum (S1, dotted line) for the  $N_3^-Fe(III)CDO$  species, which has been slightly offset for clarity (see **Table S1** for all EPR parameters used).

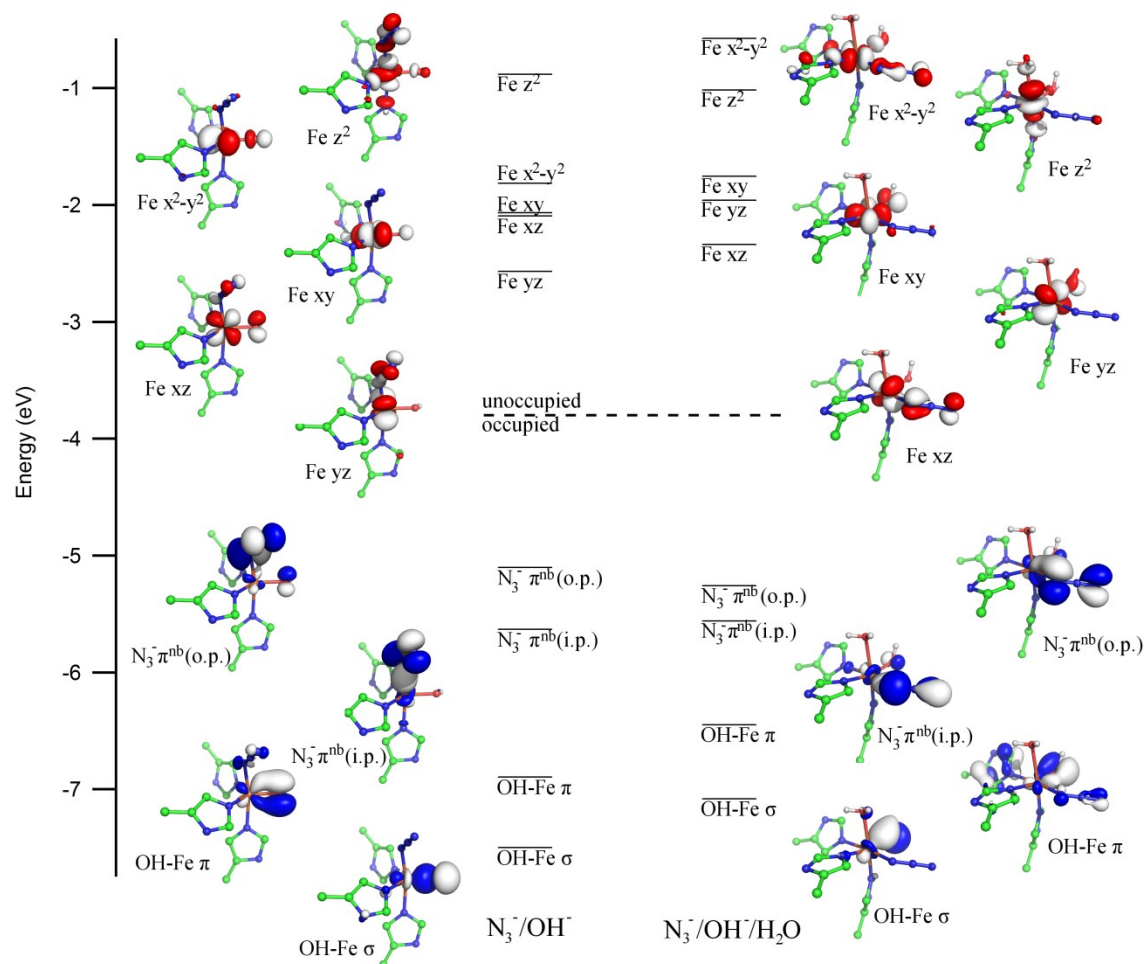

**Figure S2.** DFT-computed energies of relevant spin-down MOs for the active sites of (from left to right) the  $(\text{N}_3^-/\text{OH}^-)\text{-Fe(III)CDO}$  and  $(\text{N}_3^-/\text{OH}^-/\text{H}_2\text{O})\text{-Fe(III)CDO}$  models. Boundary surface plots of key MOs for the each model are also shown. Note that the orientations of the molecular axes differ between these models, and orbitals lacking significant Fe, azide, hydroxide, or water character are omitted for clarity. The orbital energies for each species were adjusted such that  $\alpha$ -LUMO (a ligand-based orbital with essentially identical compositions for both species) lies at 0 eV.

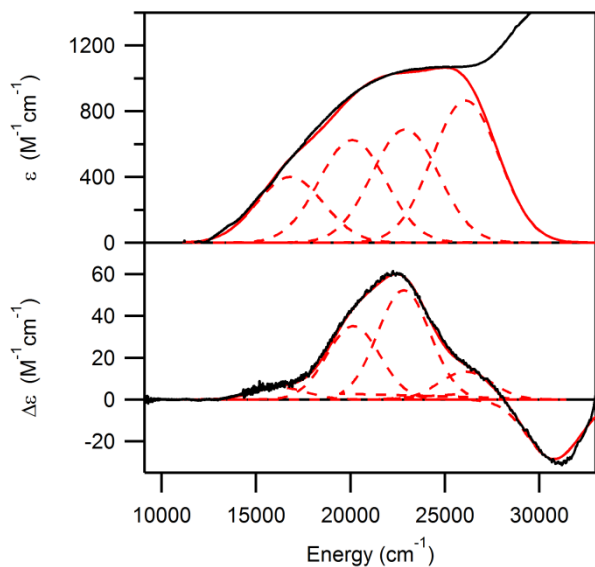

**Figure S3.** RT Abs (top) and 4.5 K MCD (bottom) spectra of Fe(III)CDO in presence of azide. Individual bands obtained from an iterative Gaussian deconvolution (red, dotted lines) and the resultant fit (solid red line) are also shown. For band positions, see **Table 1**.

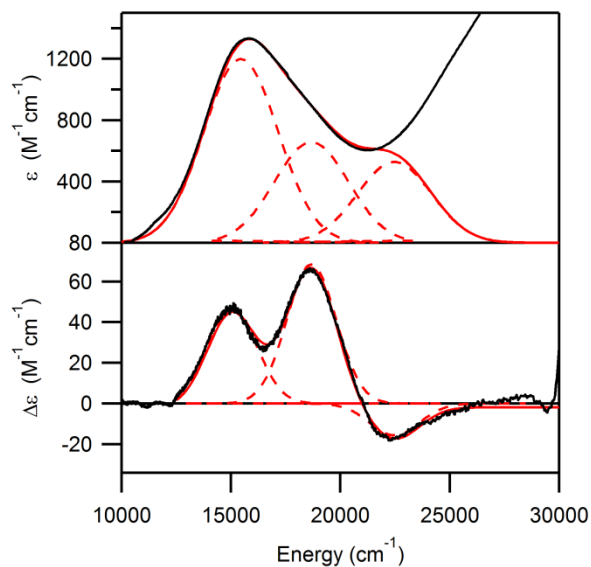

**Figure S4.** RT Abs (top) and 4.5 K MCD (bottom) spectra of Fe(III)CDO in the presence of Cys. Individual bands obtained from an iterative Gaussian deconvolution (red, dotted lines) and the resultant fit (solid red line) are also shown. For band positions, see **Table 1**.

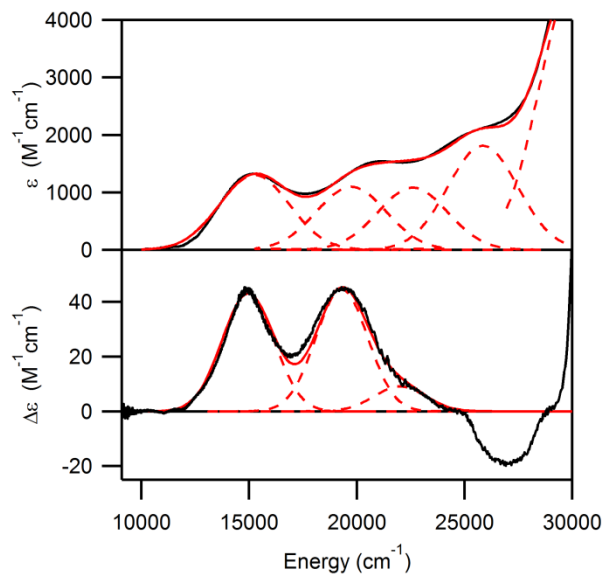

**Figure S5.** RT Abs (top) and 4.5 K MCD spectra (bottom) of Cys-Fe(III)CDO in the presence of azide. Individual bands obtained from an iterative Gaussian deconvolution (red, dotted lines) and the resultant fit (solid red line) are also shown. For band positions, see **Table 1**.

**(N<sub>3</sub><sup>-</sup>/2H<sub>2</sub>O)-Fe(III)CDO, QM/MM-optimized active site (single-point energy: -2376.30058434 Eh)**

|    |           |           |           |
|----|-----------|-----------|-----------|
| C  | -5.359482 | -1.441177 | 0.410355  |
| C  | -4.156311 | -0.563431 | 0.438782  |
| C  | -2.981857 | -0.623627 | -0.274872 |
| N  | -3.945633 | 0.452377  | 1.375381  |
| C  | -2.684769 | 0.931808  | 1.242340  |
| N  | -2.072525 | 0.302109  | 0.236800  |
| H  | -5.412186 | -2.146927 | 1.252441  |
| H  | -5.340042 | -2.027161 | -0.513062 |
| H  | -6.286057 | -0.858139 | 0.388123  |
| H  | -2.730667 | -1.242996 | -1.117203 |
| H  | -4.586853 | 0.723114  | 2.113815  |
| H  | -2.253403 | 1.686096  | 1.875824  |
| C  | 0.901200  | -5.151657 | -2.005814 |
| C  | 1.022812  | -3.965714 | -1.102203 |
| C  | 0.865143  | -2.623062 | -1.337463 |
| N  | 0.983368  | -4.082657 | 0.289474  |
| C  | 0.780670  | -2.864944 | 0.847000  |
| N  | 0.703506  | -1.945100 | -0.124344 |
| H  | -0.153564 | -5.291611 | -2.284897 |
| H  | 1.262054  | -6.059600 | -1.513200 |
| H  | 1.489151  | -5.033188 | -2.916534 |
| H  | 0.811874  | -2.096176 | -2.271042 |
| H  | 0.908569  | -4.960541 | 0.806442  |
| H  | 0.642151  | -2.746735 | 1.910233  |
| C  | -0.477448 | -0.825928 | 5.672684  |
| C  | -0.160416 | -0.306320 | 4.312988  |
| C  | -0.538269 | -0.670105 | 3.037216  |
| N  | 0.733521  | 0.741974  | 4.119980  |
| C  | 0.901535  | 0.963989  | 2.797180  |
| N  | 0.127914  | 0.128937  | 2.103638  |
| H  | -1.519791 | -1.141083 | 5.828247  |
| H  | -0.256500 | -0.050064 | 6.413147  |
| H  | 0.157318  | -1.680496 | 5.927246  |
| H  | -1.213486 | -1.455643 | 2.741089  |
| H  | 1.328323  | 1.211044  | 4.803604  |
| H  | 1.542130  | 1.738403  | 2.412521  |
| N  | -0.527939 | 0.990219  | -2.664917 |
| N  | -0.116959 | 0.137756  | -1.929459 |
| N  | -0.924133 | 1.794464  | -3.370636 |
| Fe | 0.000000  | 0.000000  | 0.000000  |
| O  | 0.000000  | 2.363693  | -0.000015 |
| H  | -0.611359 | 2.852020  | -0.560928 |
| H  | 0.895737  | 2.640778  | -0.235641 |
| O  | 2.086136  | 0.702591  | 0.076279  |
| H  | 2.527451  | 0.298965  | 0.837845  |
| H  | 2.559250  | 0.323792  | -0.712067 |

**(N<sub>3</sub><sup>-</sup>/OH)-Fe(III)CDO, QM/MM-optimized active site (single-point energy: -2299.55660646 Eh)**

|    |           |           |           |
|----|-----------|-----------|-----------|
| C  | -4.315308 | -3.398224 | 0.877900  |
| C  | -2.929443 | -2.990051 | 0.512772  |
| C  | -2.198563 | -1.886932 | 0.881668  |
| N  | -2.119629 | -3.656906 | -0.410950 |
| C  | -0.967606 | -2.951370 | -0.583664 |
| N  | -0.987167 | -1.874329 | 0.194687  |
| H  | -5.076416 | -3.129486 | 0.130585  |
| H  | -4.590851 | -2.904953 | 1.814468  |
| H  | -4.379883 | -4.475037 | 1.067505  |
| H  | -2.431808 | -1.119568 | 1.597733  |
| H  | -2.383240 | -4.477936 | -0.942886 |
| H  | -0.161575 | -3.238480 | -1.235016 |
| C  | -2.969269 | 4.132156  | 1.996918  |
| C  | -2.128387 | 3.448975  | 0.969131  |
| C  | -1.089249 | 2.571671  | 1.124619  |
| N  | -2.539368 | 3.275223  | -0.357391 |
| C  | -1.791962 | 2.302612  | -0.938004 |
| N  | -0.894440 | 1.853851  | -0.053909 |
| H  | -3.586868 | 3.383194  | 2.514221  |
| H  | -3.620453 | 4.883667  | 1.541260  |
| H  | -2.361084 | 4.647888  | 2.740479  |
| H  | -0.508484 | 2.351500  | 1.999420  |
| H  | -3.395920 | 3.646591  | -0.768555 |
| H  | -1.987350 | 1.945374  | -1.935944 |
| C  | -2.100769 | -0.822556 | -5.390091 |
| C  | -1.270752 | -0.691498 | -4.149246 |
| C  | -1.550491 | -0.556976 | -2.805206 |
| N  | 0.117493  | -0.563736 | -4.220169 |
| C  | 0.619568  | -0.325760 | -2.984573 |
| N  | -0.368210 | -0.329178 | -2.094147 |
| H  | -3.012146 | -1.434769 | -5.322296 |
| H  | -1.481491 | -1.251022 | -6.186279 |
| H  | -2.410645 | 0.166351  | -5.745911 |
| H  | -2.510071 | -0.566849 | -2.318573 |
| H  | 0.713379  | -0.502884 | -5.046112 |
| H  | 1.666870  | -0.182800 | -2.782425 |
| N  | 0.528900  | -0.872971 | 2.650040  |
| N  | 0.000000  | -0.000046 | 2.026230  |
| N  | 1.035919  | -1.706696 | 3.252502  |
| Fe | 0.000000  | 0.000000  | 0.000000  |
| O  | 1.869705  | 0.224075  | -0.220062 |
| H  | 2.065033  | 1.120087  | -0.533400 |



**(N<sub>3</sub><sup>-</sup>/OH/H<sub>2</sub>O)-Fe(III)CDO, QM/MM-optimized active site (single-point energy: -2375.99768973 Eh)**

|    |           |           |           |
|----|-----------|-----------|-----------|
| C  | -1.385651 | -5.510132 | -0.073303 |
| C  | -0.619797 | -4.239349 | -0.183853 |
| C  | -0.827408 | -3.005508 | 0.385880  |
| N  | 0.456635  | -4.053528 | -1.055618 |
| C  | 0.847656  | -2.750748 | -1.000900 |
| N  | 0.087814  | -2.099045 | -0.129990 |
| H  | -2.107071 | -5.663300 | -0.889481 |
| H  | -1.946686 | -5.509903 | 0.865479  |
| H  | -0.718506 | -6.377914 | -0.033340 |
| H  | -1.550140 | -2.701675 | 1.123154  |
| H  | 0.813629  | -4.739182 | -1.709885 |
| H  | 1.649872  | -2.318405 | -1.572433 |
| C  | -5.294968 | 0.566971  | 2.250397  |
| C  | -4.156036 | 0.720383  | 1.284683  |
| C  | -2.790619 | 0.716812  | 1.451920  |
| N  | -4.334579 | 0.598160  | -0.095840 |
| C  | -3.116043 | 0.503708  | -0.698074 |
| N  | -2.149368 | 0.575790  | 0.218430  |
| H  | -5.372849 | -0.480164 | 2.601349  |
| H  | -6.242584 | 0.851715  | 1.779755  |
| H  | -5.173813 | 1.212921  | 3.121216  |
| H  | -2.211761 | 0.757050  | 2.356354  |
| H  | -5.220779 | 0.410202  | -0.566864 |
| H  | -3.024490 | 0.336761  | -1.757477 |
| C  | -1.495407 | -0.891464 | -5.629822 |
| C  | -0.905258 | -0.465866 | -4.327576 |
| C  | -1.109467 | -0.829987 | -3.012161 |
| N  | 0.033524  | 0.559280  | -4.258804 |
| C  | 0.337097  | 0.803085  | -2.959259 |
| N  | -0.332000 | -0.032349 | -2.174042 |
| H  | -1.730286 | -1.962296 | -5.719986 |
| H  | -0.798325 | -0.642502 | -6.437805 |
| H  | -2.419235 | -0.342500 | -5.843353 |
| H  | -1.774841 | -1.582855 | -2.623642 |
| H  | 0.345398  | 1.188553  | -4.997940 |
| H  | 1.047791  | 1.549255  | -2.651566 |
| N  | 0.966293  | -0.328568 | 2.636398  |
| N  | 0.000000  | 0.000015  | 2.011093  |
| N  | 1.868546  | -0.655396 | 3.260773  |
| Fe | 0.000000  | 0.000000  | 0.000000  |
| O  | 1.862656  | 0.085022  | -0.207855 |
| H  | 2.255783  | 0.962662  | -0.250824 |
| O  | 0.156693  | 2.281677  | -0.425583 |
| H  | -0.564087 | 2.440262  | -1.051086 |
| H  | -0.150620 | 2.714417  | 0.401443  |

**(N<sub>3</sub><sup>-</sup>/2OH)-Fe(III)CDO, QM/MM-optimized active site (single-point energy: -2375.55295256 Eh)**

|    |           |           |           |
|----|-----------|-----------|-----------|
| C  | -1.209106 | -5.641525 | -0.337997 |
| C  | -0.491562 | -4.341873 | -0.311127 |
| C  | -0.852554 | -3.116180 | 0.195374  |
| N  | 0.703308  | -4.110992 | -0.996796 |
| C  | 1.011780  | -2.785385 | -0.891464 |
| N  | 0.089325  | -2.170425 | -0.170074 |
| H  | -1.783386 | -5.794922 | -1.263550 |
| H  | -1.914886 | -5.689850 | 0.495789  |
| H  | -0.521881 | -6.485260 | -0.209793 |
| H  | -1.709427 | -2.842773 | 0.787613  |
| H  | 1.185089  | -4.774902 | -1.589325 |
| H  | 1.873962  | -2.312256 | -1.327972 |
| C  | -5.777893 | 0.090469  | 1.271622  |
| C  | -4.475327 | 0.187592  | 0.531097  |
| C  | -3.162888 | 0.158798  | 0.942261  |
| N  | -4.407211 | 0.044006  | -0.856766 |
| C  | -3.095200 | -0.067551 | -1.223328 |
| N  | -2.311295 | 0.010254  | -0.150970 |
| H  | -5.904526 | -0.926056 | 1.672348  |
| H  | -6.621658 | 0.313675  | 0.606888  |
| H  | -5.838684 | 0.803818  | 2.095749  |
| H  | -2.759232 | 0.222992  | 1.936279  |
| H  | -5.202850 | -0.135178 | -1.469040 |
| H  | -2.810272 | -0.236206 | -2.245544 |
| C  | -0.954865 | -0.968811 | -5.850998 |
| C  | -0.531036 | -0.508072 | -4.482178 |
| C  | -0.583420 | -1.018677 | -3.201172 |
| N  | 0.018005  | 0.769730  | -4.315247 |
| C  | 0.249527  | 0.986359  | -2.988373 |
| N  | -0.084991 | -0.085175 | -2.284805 |
| H  | -1.106461 | -2.043625 | -6.029297 |
| H  | -0.200592 | -0.635162 | -6.575760 |
| H  | -1.888016 | -0.473328 | -6.142212 |
| H  | -0.965775 | -1.973526 | -2.878906 |
| H  | 0.120895  | 1.487625  | -5.034180 |
| H  | 0.655853  | 1.897644  | -2.582291 |
| N  | 0.453094  | -0.318619 | 2.908936  |
| N  | -0.372513 | -0.292984 | 2.062195  |
| N  | 1.236771  | -0.352890 | 3.762695  |
| Fe | 0.000000  | 0.000000  | 0.000000  |
| O  | 1.892944  | -0.081039 | 0.137543  |
| O  | 0.000031  | 1.948990  | -0.000015 |
| H  | 2.200943  | -0.583023 | 0.899429  |
| H  | -0.849472 | 2.281189  | -0.314346 |

**(OH/Cys)-Fe(III)CDO, QM/MM-optimized active site (single-point energy: -2855.97322593 Eh)**

|    |           |           |           |
|----|-----------|-----------|-----------|
| C  | -0.980774 | 0.472046  | 5.835953  |
| C  | -0.308365 | 0.322632  | 4.511322  |
| C  | -0.737732 | 0.620193  | 3.237900  |
| N  | 0.952087  | -0.250702 | 4.328491  |
| C  | 1.224350  | -0.281158 | 2.988846  |
| N  | 0.222046  | 0.251053  | 2.302200  |
| H  | -1.485229 | -0.489059 | 6.236908  |
| H  | -1.760239 | 1.235992  | 5.751831  |
| H  | -0.281342 | 0.835068  | 6.596207  |
| H  | -1.634415 | 1.128311  | 2.934296  |
| H  | 1.515427  | -0.696060 | 5.041122  |
| H  | 2.133759  | -0.667221 | 2.561707  |
| C  | -5.914215 | 0.933900  | 0.250595  |
| C  | -4.543442 | 0.340485  | 0.128326  |
| C  | -3.301758 | 0.862213  | -0.178391 |
| N  | -4.264694 | -0.944138 | 0.587387  |
| C  | -2.913040 | -1.137482 | 0.587479  |
| N  | -2.294861 | -0.054993 | 0.130676  |
| H  | -6.120178 | 1.357803  | 1.312042  |
| H  | -6.682205 | 0.185028  | 0.030014  |
| H  | -6.048874 | 1.740753  | -0.473770 |
| H  | -3.076920 | 1.787476  | -0.683182 |
| H  | -4.947250 | -1.600067 | 0.973862  |
| H  | -2.478683 | -2.063004 | 0.925613  |
| C  | -0.095398 | -5.490402 | 1.844604  |
| C  | 0.040543  | -4.208664 | 1.104935  |
| C  | -0.143906 | -2.892456 | 1.454819  |
| N  | 0.427994  | -4.162094 | -0.232864 |
| C  | 0.447083  | -2.871475 | -0.646957 |
| N  | 0.123871  | -2.075806 | 0.365463  |
| H  | -0.089081 | -5.389771 | 2.991745  |
| H  | 0.734879  | -6.152161 | 1.569138  |
| H  | -1.015900 | -6.019043 | 1.558960  |
| H  | -0.482758 | -2.485611 | 2.392395  |
| H  | 0.605743  | -4.931168 | -0.875977 |
| H  | 0.669266  | -2.554504 | -1.649292 |
| O  | -0.167694 | -0.365800 | -1.836044 |
| Fe | 0.000000  | 0.000000  | 0.000000  |
| H  | 0.598404  | -0.095795 | -2.352814 |
| N  | -0.000015 | 2.222534  | 0.000000  |
| C  | 1.332733  | 2.821548  | 0.322617  |
| C  | 1.423538  | 4.328537  | 0.039000  |
| O  | 0.779968  | 4.793839  | -1.000900 |
| C  | 2.419693  | 2.096710  | -0.488312 |
| S  | 2.423676  | 0.288666  | -0.140335 |
| O  | 2.190704  | 5.040039  | 0.764206  |
| H  | -0.706345 | 2.622391  | 0.621643  |
| H  | -0.267731 | 2.458145  | -0.961441 |
| H  | 1.506638  | 2.659042  | 1.387283  |
| H  | 3.397705  | 2.509689  | -0.235641 |
| H  | 2.248383  | 2.251556  | -1.558273 |

**(H<sub>2</sub>O/Cys)-Fe(III)CDO QM/MM-optimized active site (single-point energy: -2865.40635266 Eh)**

|    |           |           |           |
|----|-----------|-----------|-----------|
| C  | -1.609695 | 0.187744  | 5.478317  |
| C  | -0.746400 | 0.128600  | 4.268204  |
| C  | -1.018173 | 0.472382  | 2.966766  |
| N  | 0.516830  | -0.463181 | 4.220032  |
| C  | 0.949554  | -0.468842 | 2.928925  |
| N  | 0.039566  | 0.105225  | 2.144363  |
| H  | -2.133560 | -0.757431 | 5.683655  |
| H  | -2.371140 | 0.959595  | 5.337189  |
| H  | -1.044098 | 0.476761  | 6.368423  |
| H  | -1.869614 | 0.991272  | 2.570694  |
| H  | 0.985107  | -0.933655 | 4.985031  |
| H  | 1.889908  | -0.880585 | 2.606735  |
| C  | -5.822571 | 0.912216  | -0.757919 |
| C  | -4.444946 | 0.315536  | -0.752609 |
| C  | -3.173096 | 0.838791  | -0.890472 |
| N  | -4.223511 | -0.997574 | -0.346054 |
| C  | -2.886047 | -1.213608 | -0.208679 |
| N  | -2.206680 | -0.111633 | -0.529175 |
| H  | -6.130829 | 1.229492  | 0.208710  |
| H  | -6.555603 | 0.182465  | -1.117340 |
| H  | -5.870605 | 1.764450  | -1.440231 |
| H  | -2.893723 | 1.798203  | -1.296036 |
| H  | -4.949127 | -1.667206 | -0.076996 |
| H  | -2.506302 | -2.165939 | 0.125870  |
| C  | -0.184662 | -5.585159 | 1.259125  |
| C  | 0.012222  | -4.264145 | 0.604950  |
| C  | -0.251587 | -2.971390 | 0.989792  |
| N  | 0.563141  | -4.140625 | -0.669098 |
| C  | 0.605331  | -2.833038 | -1.017639 |
| N  | 0.132004  | -2.092010 | -0.018600 |
| H  | -0.333420 | -5.552292 | 2.348511  |
| H  | 0.692856  | -6.214203 | 1.067978  |
| H  | -1.042175 | -6.113708 | 0.820923  |
| H  | -0.719467 | -2.622116 | 1.894562  |
| H  | 0.844193  | -4.880005 | -1.312866 |
| H  | 0.964417  | -2.481369 | -1.966873 |
| O  | 0.217026  | -0.177582 | -2.201645 |
| H  | 1.100891  | 0.078903  | -2.494781 |
| H  | -0.425629 | 0.302261  | -2.768768 |
| Fe | 0.000000  | 0.000000  | 0.000000  |
| N  | 0.000000  | 2.204727  | -0.000015 |
| C  | 1.294327  | 2.776093  | 0.492767  |
| C  | 1.434952  | 4.291016  | 0.253632  |
| O  | 0.913498  | 4.771347  | -0.849152 |
| C  | 2.480347  | 2.086090  | -0.203308 |
| S  | 2.400116  | 0.256104  | -0.106674 |
| O  | 2.122467  | 4.970230  | 1.068924  |
| H  | -0.769272 | 2.577652  | 0.568588  |
| H  | -0.166000 | 2.514526  | -0.963013 |
| H  | 1.337296  | 2.589676  | 1.566895  |
| H  | 3.416183  | 2.425552  | 0.245438  |
| H  | 2.510773  | 2.361313  | -1.264984 |

**Cys-Fe(III)CDO, QM/MM-optimized active site (single-point energy: -2779.9046462 Eh)**

|    |           |           |           |
|----|-----------|-----------|-----------|
| C  | -2.839554 | -0.300064 | 4.787033  |
| C  | -1.655579 | -0.198196 | 3.887436  |
| C  | -1.561707 | 0.290741  | 2.608124  |
| N  | -0.400574 | -0.757675 | 4.141357  |
| C  | 0.379227  | -0.619949 | 3.033554  |
| N  | -0.297821 | 0.026642  | 2.086060  |
| H  | -3.348373 | -1.339859 | 4.769196  |
| H  | -3.587250 | 0.432739  | 4.468628  |
| H  | -2.588470 | -0.050140 | 5.821289  |
| H  | -2.284332 | 0.849243  | 2.043350  |
| H  | -0.143112 | -1.296280 | 4.960098  |
| H  | 1.384903  | -0.993790 | 2.948898  |
| C  | -5.112534 | 0.477844  | -2.484695 |
| C  | -3.754227 | -0.042480 | -2.144379 |
| C  | -2.547028 | 0.568878  | -1.883606 |
| N  | -3.553528 | -1.369446 | -1.772919 |
| C  | -2.298996 | -1.518784 | -1.275100 |
| N  | -1.649551 | -0.350891 | -1.326721 |
| H  | -5.725388 | 0.751328  | -1.538040 |
| H  | -5.682434 | -0.261490 | -3.055054 |
| H  | -5.036346 | 1.367020  | -3.115082 |
| H  | -2.234665 | 1.567352  | -2.140839 |
| H  | -4.276123 | -2.093277 | -1.744736 |
| H  | -1.953156 | -2.466858 | -0.893600 |
| C  | 0.307388  | -5.647232 | 0.975037  |
| C  | 0.500092  | -4.273376 | 0.432358  |
| C  | -0.071548 | -3.058121 | 0.727509  |
| N  | 1.381897  | -3.996033 | -0.611557 |
| C  | 1.314682  | -2.676926 | -0.920197 |
| N  | 0.448044  | -2.075012 | -0.109634 |
| H  | -0.185562 | -5.706512 | 2.017349  |
| H  | 1.279343  | -6.150055 | 1.042160  |
| H  | -0.302246 | -6.249008 | 0.287323  |
| H  | -0.841843 | -2.838318 | 1.447281  |
| H  | 1.958389  | -4.648560 | -1.143509 |
| H  | 1.902145  | -2.216309 | -1.695404 |
| Fe | 0.000000  | 0.000000  | 0.000000  |
| N  | 0.000031  | 2.198593  | 0.000031  |
| C  | 1.189300  | 2.678452  | 0.783127  |
| C  | 1.313339  | 4.214035  | 0.897461  |
| O  | 1.094238  | 4.919724  | -0.188187 |
| C  | 2.460297  | 2.106277  | 0.134705  |
| S  | 2.328918  | 0.289948  | -0.065796 |
| O  | 1.702637  | 4.680862  | 2.003510  |
| H  | -0.866119 | 2.587448  | 0.389786  |
| H  | 0.089905  | 2.539886  | -0.965134 |
| H  | 1.082474  | 2.290710  | 1.796646  |
| H  | 3.337830  | 2.329300  | 0.744202  |
| H  | 2.619812  | 2.521057  | -0.866165 |

**(N<sub>3</sub><sup>-</sup>/Cys)-Fe(III)CDO S=1/2, QM/MM-optimized active site (single-point energy: -2944.32513165 Eh)**

|    |           |           |           |
|----|-----------|-----------|-----------|
| C  | -1.446884 | -0.035248 | 5.480759  |
| C  | -0.651917 | -0.053314 | 4.219391  |
| C  | -0.972153 | 0.336136  | 2.939056  |
| N  | 0.620285  | -0.614487 | 4.109665  |
| C  | 1.011627  | -0.560303 | 2.804581  |
| N  | 0.070114  | 0.023361  | 2.071228  |
| H  | -1.834976 | -1.022018 | 5.773468  |
| H  | -2.232742 | 0.720123  | 5.396423  |
| H  | -0.831055 | 0.261017  | 6.335739  |
| H  | -1.843597 | 0.859451  | 2.593231  |
| H  | 1.119095  | -1.112656 | 4.835205  |
| H  | 1.950211  | -0.929810 | 2.433289  |
| C  | -5.763916 | 0.871613  | -0.478241 |
| C  | -4.373032 | 0.293503  | -0.452850 |
| C  | -3.099060 | 0.830246  | -0.508698 |
| N  | -4.157120 | -1.032700 | -0.082779 |
| C  | -2.824341 | -1.237045 | 0.120071  |
| N  | -2.147003 | -0.120789 | -0.121384 |
| H  | -6.120346 | 1.166641  | 0.519730  |
| H  | -6.471313 | 0.139832  | -0.884552 |
| H  | -5.809891 | 1.745850  | -1.131729 |
| H  | -2.801758 | 1.788712  | -0.901535 |
| H  | -4.884293 | -1.719910 | 0.128600  |
| H  | -2.443405 | -2.196976 | 0.422180  |
| C  | -0.093704 | -5.559021 | 1.060822  |
| C  | 0.092697  | -4.194580 | 0.494293  |
| C  | -0.205917 | -2.928558 | 0.943985  |
| N  | 0.673645  | -3.989609 | -0.751266 |
| C  | 0.696732  | -2.660660 | -1.025345 |
| N  | 0.178253  | -1.986588 | -0.005203 |
| N  | -0.109314 | -0.089096 | -1.924622 |
| N  | 0.736023  | -0.068893 | -2.765945 |
| N  | 1.490800  | -0.113937 | -3.631027 |
| Fe | 0.000000  | 0.000000  | 0.000000  |
| N  | 0.000015  | 2.068909  | -0.000031 |
| C  | 1.300034  | 2.662094  | 0.461472  |
| C  | 1.400055  | 4.192337  | 0.317520  |
| O  | 0.814270  | 4.753647  | -0.705231 |
| C  | 2.412292  | 1.963806  | -0.327576 |
| S  | 2.255646  | 0.149597  | -0.056442 |
| O  | 2.113998  | 4.824707  | 1.159714  |
| H  | -0.178497 | -5.602676 | 2.156677  |
| H  | 0.759933  | -6.185135 | 0.773087  |
| H  | -0.982452 | -6.043610 | 0.635269  |
| H  | -0.692093 | -2.643829 | 1.861450  |
| H  | 0.967484  | -4.675156 | -1.443649 |
| H  | 1.114853  | -2.267548 | -1.932724 |
| H  | -0.758270 | 2.458008  | 0.565384  |
| H  | -0.177719 | 2.343246  | -0.973114 |
| H  | 1.399582  | 2.421844  | 1.521210  |
| H  | 3.394104  | 2.298019  | 0.009415  |
| H  | 2.315887  | 2.173279  | -1.398392 |

**(N<sub>3</sub><sup>-</sup>/Cys)-Fe(III)CDO S=5/2, QM/MM-optimized active site (single-point energy: -2944.29705305 Eh)**

|    |           |           |           |
|----|-----------|-----------|-----------|
| C  | -1.569717 | 0.217148  | -5.412155 |
| C  | -0.736221 | 0.174118  | -4.177292 |
| C  | -1.024734 | -0.271637 | -2.907944 |
| N  | 0.519241  | 0.772720  | -4.063507 |
| C  | 0.922104  | 0.683258  | -2.756256 |
| N  | 0.007858  | 0.047958  | -2.034409 |
| H  | -2.111603 | 1.227005  | -5.575790 |
| H  | -2.340881 | -0.557632 | -5.350128 |
| H  | -0.980438 | -0.009064 | -6.307129 |
| H  | -1.877762 | -0.831757 | -2.571396 |
| H  | 0.984055  | 1.332031  | -4.764800 |
| H  | 1.861176  | 1.044281  | -2.376480 |
| C  | -5.693802 | -0.967834 | 0.671524  |
| C  | -4.308853 | -0.379898 | 0.624420  |
| C  | -3.026627 | -0.904007 | 0.613297  |
| N  | -4.121780 | 0.958389  | 0.292084  |
| C  | -2.792618 | 1.177322  | 0.043167  |
| N  | -2.093430 | 0.065400  | 0.225769  |
| H  | -6.099655 | -1.255722 | -0.381516 |
| H  | -6.394287 | -0.250885 | 1.116898  |
| H  | -5.717728 | -1.858398 | 1.303467  |
| H  | -2.706909 | -1.874100 | 0.958298  |
| H  | -4.863007 | 1.638321  | 0.112305  |
| H  | -2.427856 | 2.146027  | -0.244919 |
| C  | -0.198700 | 5.604614  | -0.787384 |
| C  | 0.031174  | 4.219421  | -0.287766 |
| C  | -0.267395 | 2.970917  | -0.784195 |
| N  | 0.670425  | 3.963837  | 0.921005  |
| C  | 0.720016  | 2.614349  | 1.121307  |
| N  | 0.166687  | 1.984879  | 0.094315  |
| N  | 0.000000  | -0.000031 | 2.016113  |
| N  | 0.823257  | 0.005936  | 2.864532  |
| N  | 1.569077  | 0.033142  | 3.755905  |
| Fe | 0.000000  | 0.000000  | 0.000000  |
| N  | 0.061447  | -2.105469 | -0.032135 |
| C  | 1.368484  | -2.660751 | -0.504669 |
| C  | 1.490753  | -4.181473 | -0.372192 |
| O  | 0.961624  | -4.764160 | 0.674469  |
| C  | 2.487747  | -1.946320 | 0.276550  |
| S  | 2.389374  | -0.139496 | -0.050507 |
| O  | 2.167664  | -4.835281 | -1.241821 |
| H  | -0.321960 | 5.699800  | -1.930649 |
| H  | 0.655731  | 6.232117  | -0.501053 |
| H  | -1.083450 | 6.060608  | -0.318146 |
| H  | -0.782425 | 2.722000  | -1.696930 |
| H  | 0.971573  | 4.617859  | 1.639496  |
| H  | 1.187134  | 2.171692  | 1.981049  |
| H  | -0.692245 | -2.535233 | -0.570724 |
| H  | -0.084229 | -2.353790 | 0.949341  |
| H  | 1.459610  | -2.405487 | -1.562271 |
| H  | 3.461000  | -2.337341 | -0.025940 |
| H  | 2.354874  | -2.130737 | 1.349411  |
